# Supplementary material for: Malnutrition Defined by Geriatric Nutritional Risk Index Predicts Outcomes in Severe Stroke Patients: A Propensity Score-Matched Analysis
Source: MDPI journal article supplement (doi:10.3390/nu14224786), 2022-11-12
Supplement: s1 [file s1]

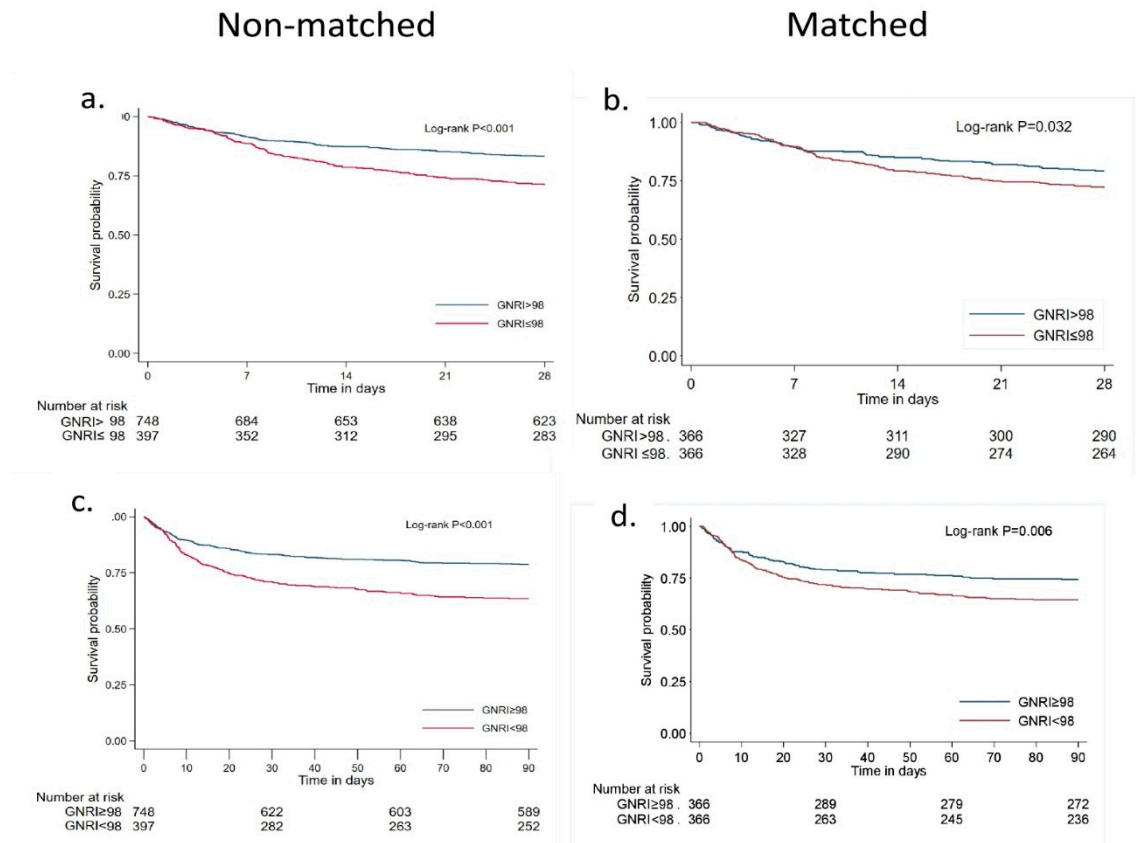

**Figure S1.** Kaplan-Meier curves for severe stroke patients with different GNRI groups at short-term of onset. Survival probability in the total (nonmatched) cohort for 28-day (a.) and 90-day(c.). Survival probability in the matched cohort for 28-day (b.) and 90-day(d.)

**Table S1.** Association between GNRI group and the outcomes of severe stroke patients (in non-matched cohort)

| Model   | 28-day mortality         |                   | 90-day mortality         |                   | 1-year mortality         |                   |
|---------|--------------------------|-------------------|--------------------------|-------------------|--------------------------|-------------------|
|         | Hazard ratio<br>(95% CI) | <i>p</i><br>value | Hazard ratio<br>(95% CI) | <i>p</i><br>value | Hazard ratio<br>(95% CI) | <i>p</i><br>value |
| Model 1 | 1.716(1.328-2.218)       | <0.001            | 1.756(1.399-2.204)       | <0.001            | 1.753(1.427-2.153)       | <0.001            |
| Model 2 | 1.404(1.076-1.831)       | 0.001             | 1.459(1.152-1.848)       | 0.002             | 1.449(1.169-1.794)       | 0.001             |
| Model 3 | 1.445(1.090-1.915)       | 0.01              | 1.532(1.194-1.965)       | 0.001             | 1.523(1.224-1.895)       | <0.001            |

Hazard ratio and 95% CI for the GNRI groups in mortality at 28 days, 90 days, and 1-year mortality were calculated using different Cox regression models. The high GNRI group (>98) was always considered the reference group.

Model 1 adjusted for age, and gender. Model 2 adjusted for model 1 plus SAPS score, SOFA score, vital signs (heart rate, temperature, and MAP), and complications (atrial fibrillation, COPD, diabetes, sepsis, liver disease, and malignancy). Model 3 adjusted for model 2 plus Hb, WBC, platelet, sodium, potassium, BUN, creatinine, chloride, and bicarbonate.

CI, confidence interval; SAPS, simplified acute physiology score; SOFA, Sequential Organ Failure Asses; MAP, mean arterial pressure; COPD, chronic obstructive pulmonary disease; Hb, Hemoglobin; WBC, white blood cell count; BUN, blood urea nitrogen.

**Table S2.** Hazard ratio and 95% CI for the GNRI group in mortality, adjusting for variables that remained unbalanced between the groups in the propensity score model

|                | 28-day mortality |          | 90-day mortality |          | 1-year mortality |          |
|----------------|------------------|----------|------------------|----------|------------------|----------|
|                | Hazard ratio     | <i>p</i> | Hazard ratio     | <i>p</i> | Hazard ratio     | <i>p</i> |
|                | (95% CI)         | value    | (95% CI)         | value    | (95% CI)         | value    |
| <b>Overall</b> | 1.42(1.04-1.93)  | 0.03     | 1.44(1.10-1.89)  | 0.008    | 1.50(1.18-1.92)  | 0.001    |

Based-on conditional Cox proportional hazards model, adjusting for variables that remained unbalanced between the groups in the propensity score model
